# Supplementary material for: The Application of REDOR NMR to Understand the Conformation of Epothilone B
Source: Int J Mol Sci. 2017 Jul 9;18(7):1472. doi: 10.3390/ijms18071472 (PMC5535963; doi:10.3390/ijms18071472)

## Supporting Information

### The Application of REDOR NMR to Understand the Conformation of Epothilone B

Spectral data for compounds **3**, **7-10**, **17**, **18**, **21**, **23-25**, **27**, **29**, **31**, **32**, **35-42**, **45-48**.

**Figure S1.** Synthesis of analog **3** and its intermediate compounds: (A) Synthesis of compound **25**, (B) Synthesis of compound **39**, (C) Synthesis of compound **11**, (D) Synthesis of compound **33**, (E) Synthesis of compound **47**, (F) Synthesis of compound **3**, (E) Synthesis of compound **20**.

**Figure S2.** TEM images of the analog **3**-bound microtubules. The scale bars represent 1  $\mu\text{m}$  (A) and 500 nm (B). Before collecting the TEM images, the lyophilized powder was resuspended in PEM buffer supplemented with 20  $\mu\text{M}$  epothilone B.

**Figure S3.** A schematic representation of the  $^2\text{H}\{^{19}\text{F}\}$  REDOR sequence for a dephasing signal ( $S$ ) at  $4T_r$ .

**Figure S4.** Solid-state  $^{19}\text{F}$  MAS NMR spectra of 2-fluoro-2-methyl- $\text{d}_3$ -malonic acid ([2-F,2-Me- $\text{d}_3$ ]MA) lyophilized in pipes buffer.

**Figure S5.** The full-echo ( $S_0$ ) and dephasing ( $S$ ) spectra obtained by co-adding the most intense four spinning sidebands in the  $^2\text{H}\{^{19}\text{F}\}$  REDOR spectra (Figure 5). The peak heights of the difference ( $\Delta S$ ) spectra and noise levels in parenthesis being marked on each spectrum in fractions of the corresponding full-echo spectra. The dipolar evolution times are marked on top in multiples of the rotor period ( $T_r$ ).

**Figure S6.**  $^2\text{H}\{^{19}\text{F}\}$  REDOR dephasing curves for possible distance pairs (see also Table S2).

**Figure S7.** Hydrogen-bond interactions of polar atoms of the epothilone A conformer *epoA(TUB)<sub>4i50</sub>* with amino residues in tubulin dimer.

**Figure S8.** The cell viability assay curves for the [D,F]-labelled and natural epothilone B against human lung carcinoma (A549) and cervix adenocarcinoma (HeLa).

**Table S1.** Constituents of the lyophilized powders for REDOR NMR

| Compound <sup>a</sup>         | Analog <b>3</b> -bound<br>microtubules |     | [2-F,2-Me-d <sub>3</sub> ]MA |     |
|-------------------------------|----------------------------------------|-----|------------------------------|-----|
|                               | mg                                     | wt% | mg                           | wt% |
| Sucrose                       | 60                                     | 59  | -                            | -   |
| Tubulin                       | 40                                     | 39  | -                            | -   |
| Labeled compound <sup>b</sup> | 0.18                                   | < 1 | 9.5                          | 11  |
| Pipes                         | 1.21 <sup>c</sup>                      | 1   | 67.5                         | 75  |
| EGTA                          | 0.02 <sup>c</sup>                      | < 1 | -                            | -   |
| MgCl <sub>2</sub>             | 0.01 <sup>c</sup>                      | < 1 | -                            | -   |
| K <sup>+</sup> ion            | 0.23 <sup>c</sup>                      | < 1 | 13 <sup>e</sup>              | 14  |
| Water                         | 20 <sup>d</sup>                        | 17  | -                            | -   |
| Sum                           | 122                                    | 100 | 90                           | 100 |

<sup>a</sup>The numbers are estimated values based on the reaction conditions.

<sup>b</sup>The labeled compound is either analog **3** or [2-F,2-Me-d<sub>3</sub>]MA.

<sup>c</sup>From tubulin assembly buffer entrapped in the microtubule pellet (see text).

<sup>d</sup>Bound water molecules (see text)

<sup>e</sup>From KOH used for pH adjust

Table S2. SIMPSON calculations for possible distance pairs ( $^2\text{H}$ - $^{19}\text{F}$ ) to fit the experimental data (see Figure S6)

| SIMPSON | REDOR distances, Å |      | RMSD <sup>a</sup> |
|---------|--------------------|------|-------------------|
|         | Short              | Long |                   |
| Fit1    | 5.9                | 5.9  | 0.01              |
| Fit2    | 5.6                | 6.2  | 0.01              |
| Fit3    | 5.3                | 7.7  | 0.01              |
| Fit4    | 5.0                | 7.7  | 0.01              |
| Fit5    | 4.7                | 7.4  | 0.02              |

<sup>a</sup>root-mean-square deviation from the experimental data

**Figure S1. Lee *et al.***

**(A) Synthesis of compound **25****

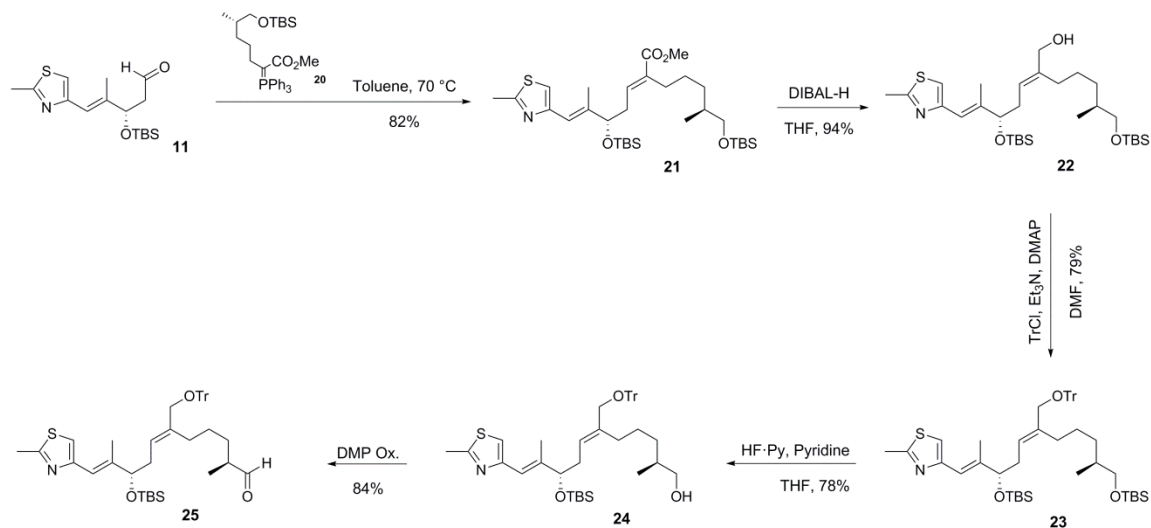

**(B) Synthesis of compound **39****

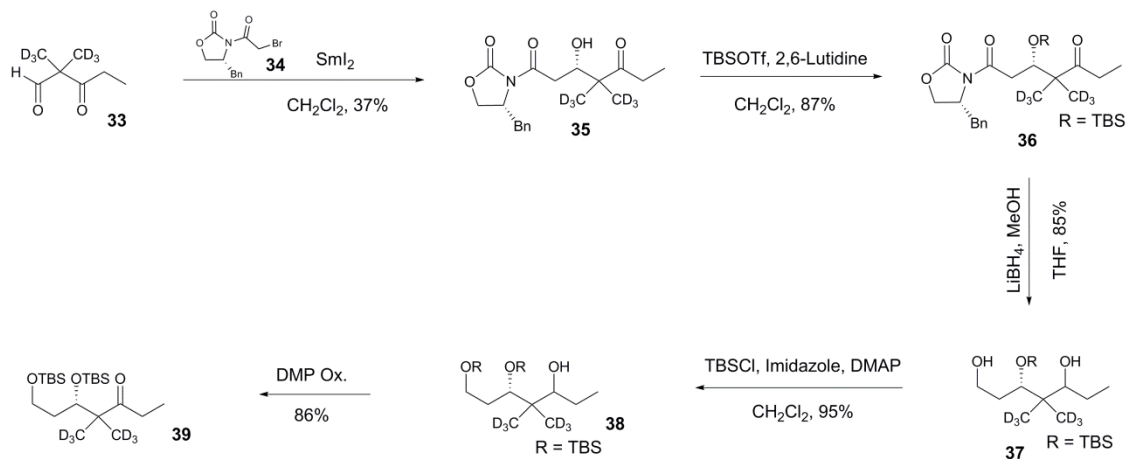

(C) Synthesis of compound **11**

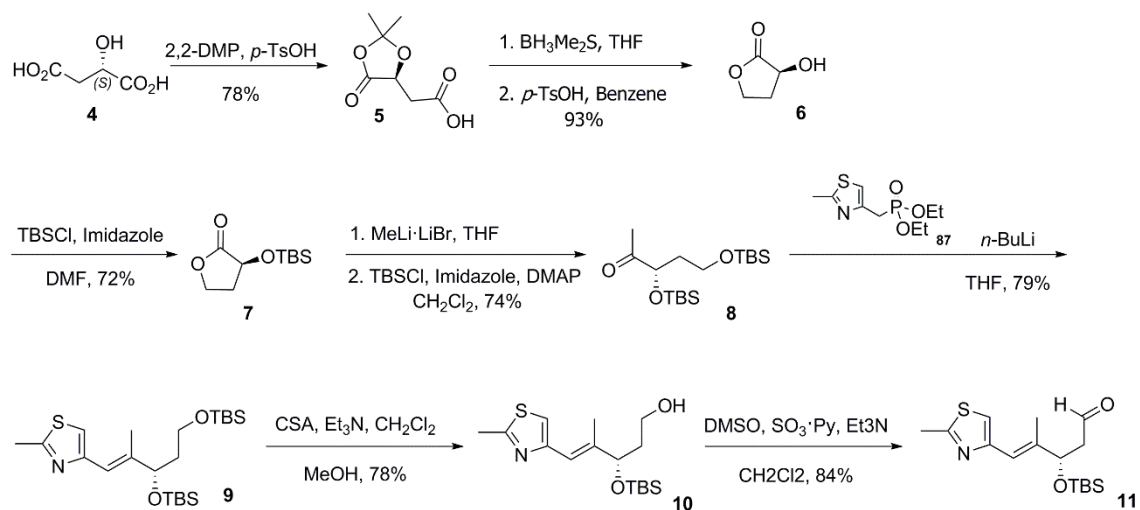

(D) Synthesis of compound **33**

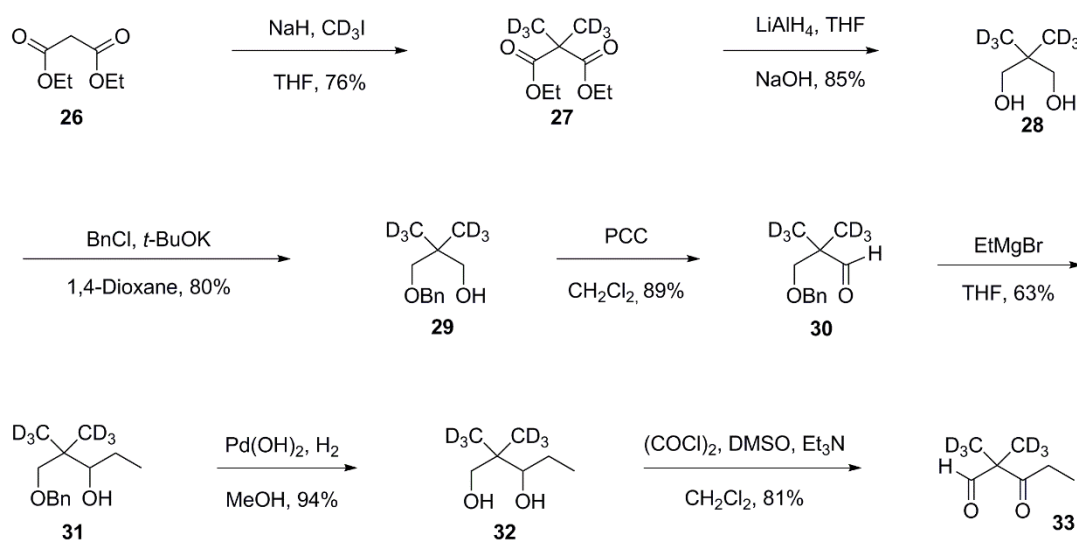

(E) Synthesis of compound **47**

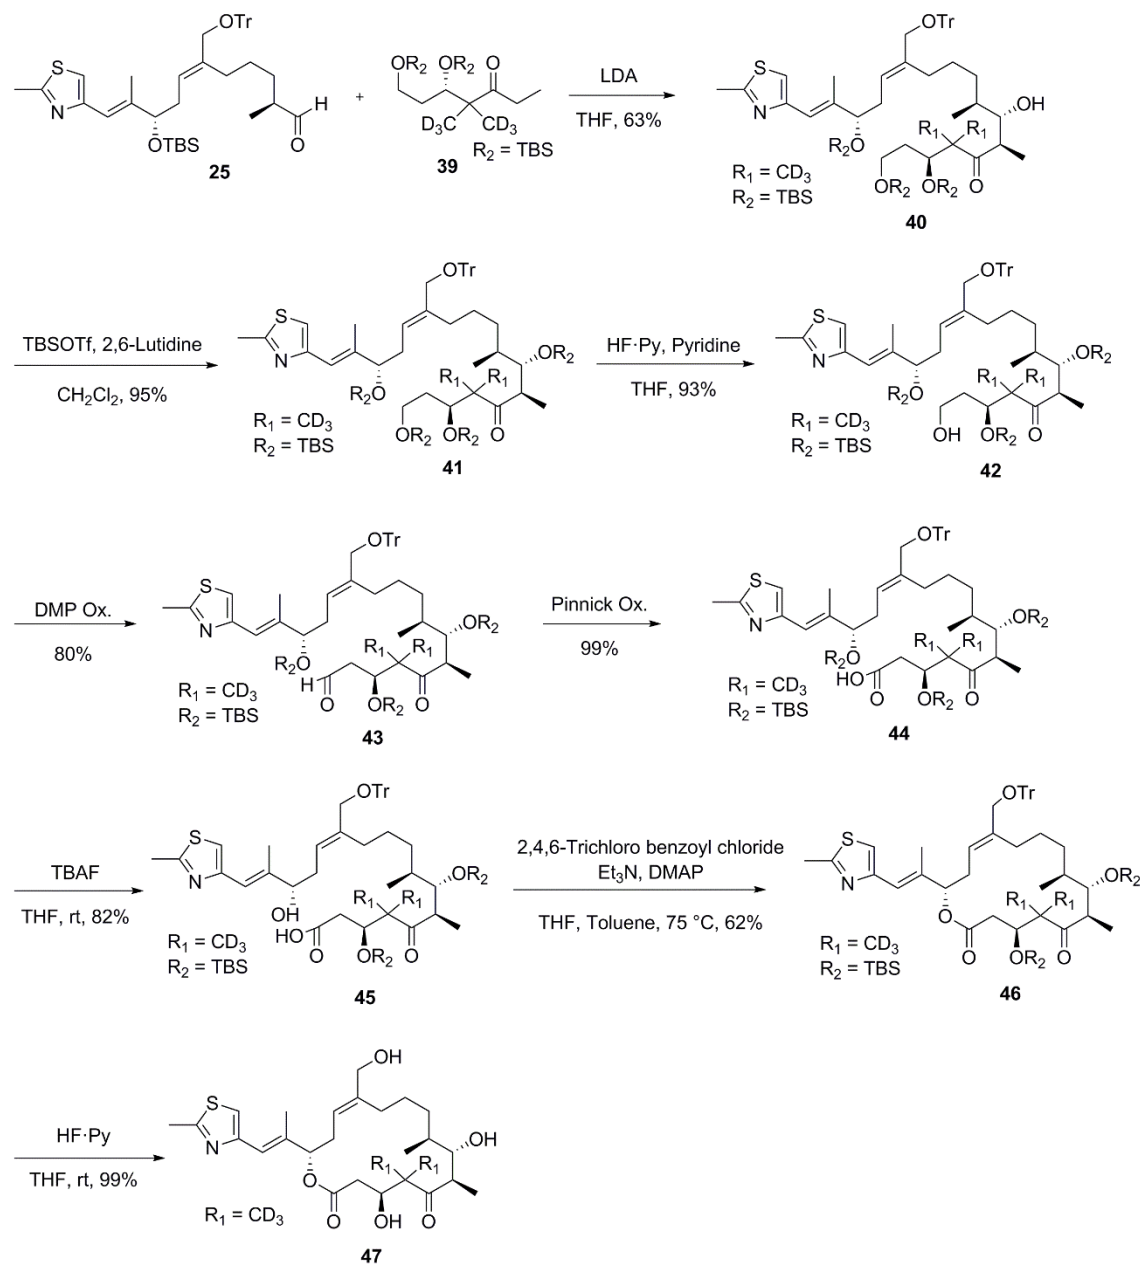

(F) Synthesis of compound **3**

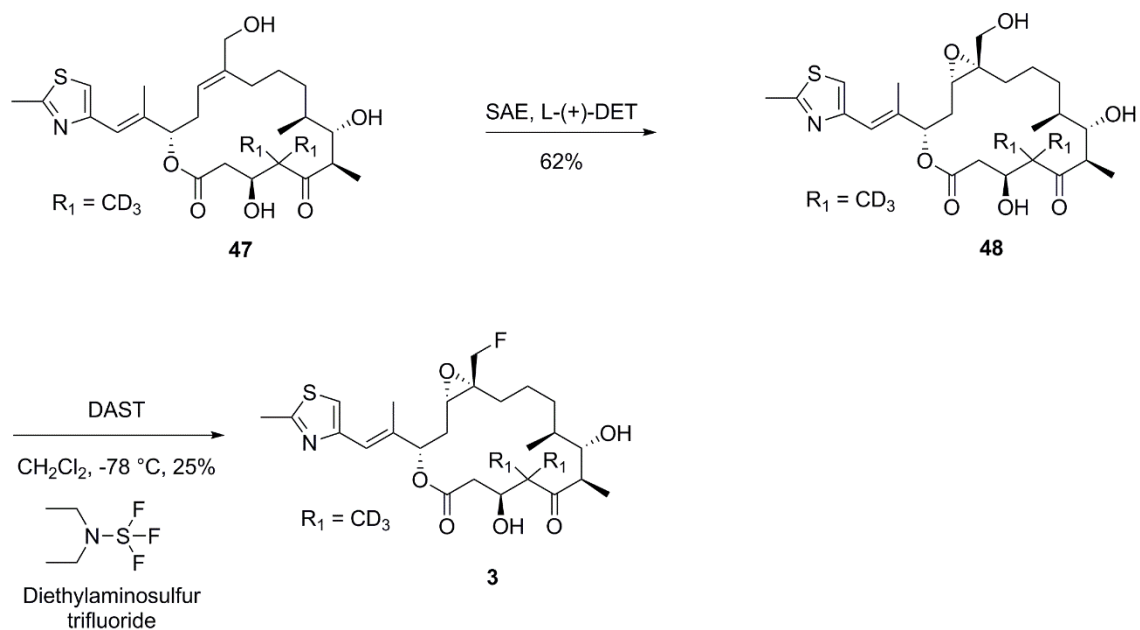

(G) Synthesis of compound **20**

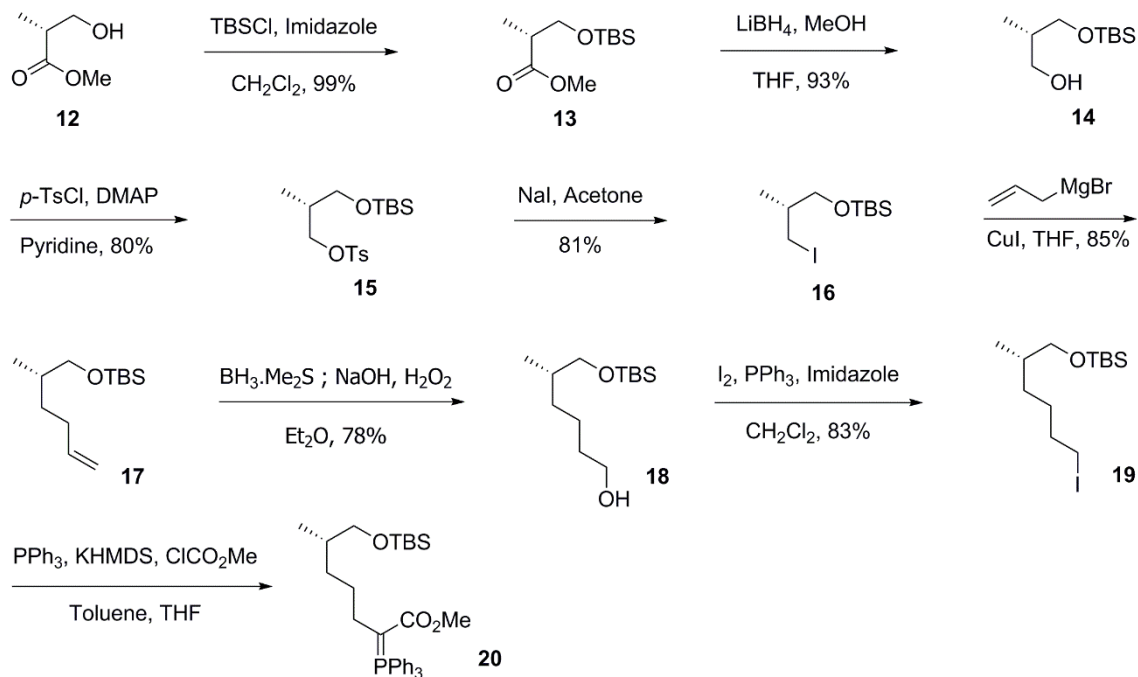

Figure S2. Lee *et al.*

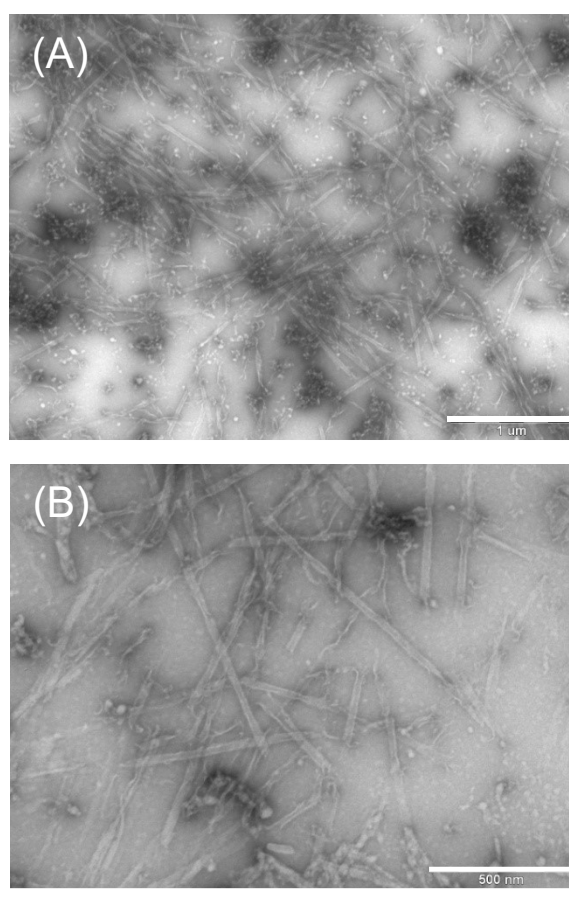

Fig. S3 Lee *et al.*

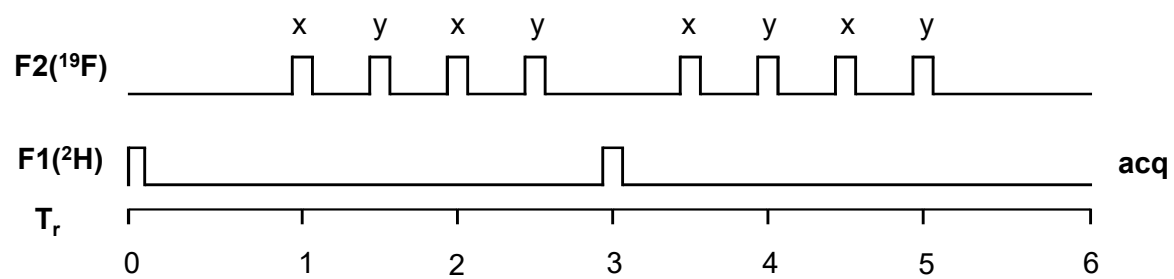

Figure S4. Lee *et al.*

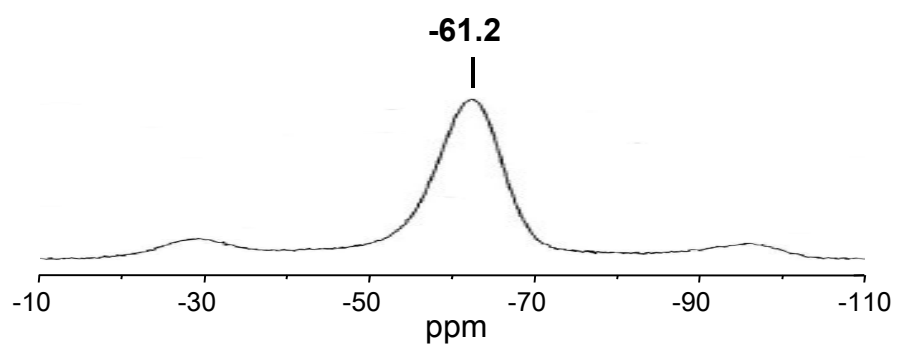

Figure S5. Lee *et al.*

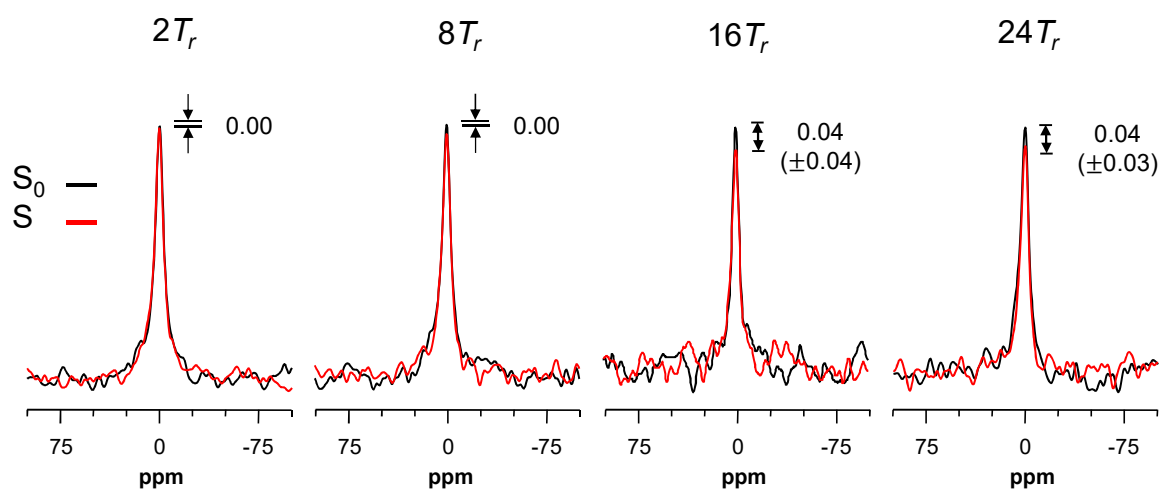

Figure S6. Lee *et al.*

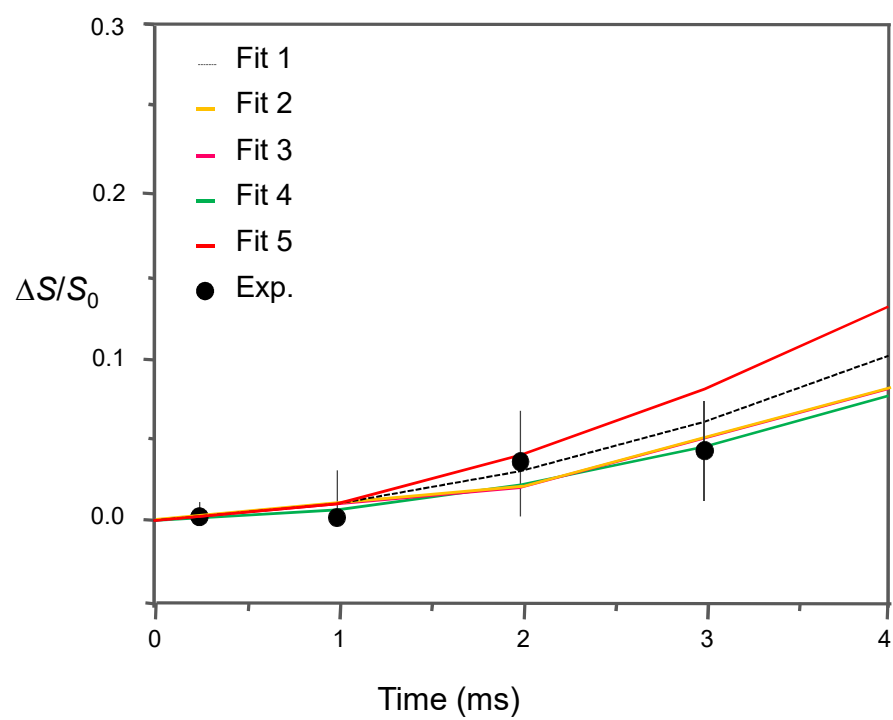

Figure S7. Lee *et al.*

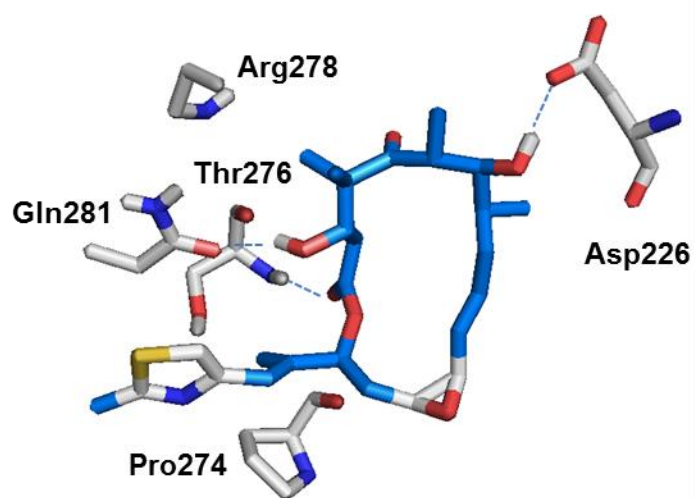

Figure S8. Lee *et al.*

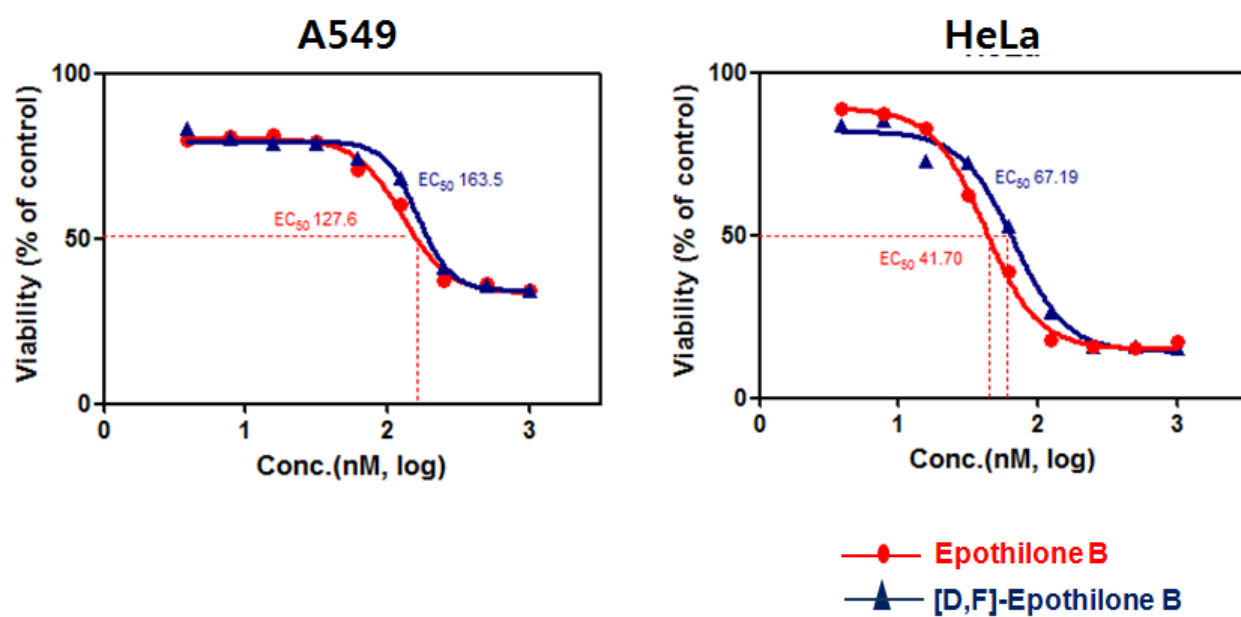

Supplement: Supplementary file 1 [file ijms-18-01472-s001.pdf]
